# Supplementary material for: A Pilot Trial of the Combination of Transgenic NY-ESO-1–reactive Adoptive Cellular Therapy with Dendritic Cell Vaccination with or without Ipilimumab
Source: Oxford University Press journal article supplement (doi:10.1158/1078-0432.ccr-18-3496), 2018-12-20
Supplement: 10780432ccr183496-sup-211120_2_supp_5200176_pj6gx6.docx [file 10780432ccr183496-sup-211120_2_supp_5200176_pj6gx6.docx]

**Table S1. List of mass cytometry antibodies utilized.**

|  |  |  |  |  |  |
| --- | --- | --- | --- | --- | --- |
| Mass | **Element** | **Target** | **Clone** | **Vendor** | **Catalog Number** |
| 89 | Y | CD45 | H130 | Fluidigm | 3089003B |
| 141 | Pr | CD3 | UCHT1 | Fluidigm | 3999999-3 |
| 142 | Nd | CD19 | HIB19 | Fluidigm | 3142001B |
| 143 | Nd | CD117 | 104D2 | Fluidigm | 3143001B |
| 144 | Nd | CD11b | IRCF44 | Fluidigm | 3144001B |
| 145 | Nd | CD4 | RPA-T4 | Fluidigm | 3145001B |
| 146 | Nd | CD8a | RPA-T8 | Fluidigm | 3146001B |
| 147 | Sm | CD11c | BU15 | Fluidigm | 3147008B |
| 148 | Nd | CD14 | RMO52 | Fluidigm | 3148010B |
| 150 | Nd | FcER1 | AER-37 | Fluidigm | 3150027B |
| 151 | Eu | CD123 | 6H6 | Fluidigm | 3151001B |
| 152 | Sm | gdTCR | 11F2 | Fluidigm | 3152008B |
| 153 | Eu | CD45RA | HI100 | Fluidigm | 3153001B |
| 154 | Sm | TIM3 | F38-2E2 | Fluidigm | 3154010B |
| 155 | Gd | TCR Vβ13.1 | H131 | BioLegend | 362402 |
| 156 | Gd | PD-L1 | 29E.2A3 | Fluidigm | 3156026B |
| 158 | Gd | CD27 | L128 | Fluidigm | 3158010B |
| 160 | Gd | T-bet | 4B10 | Fluidigm | 3160010B |
| 161 | Dy | CTLA-4 | 14D3 | Fluidigm | 3161004B |
| 162 | Dy | FoxP3 | PCH101 | Fluidigm | 3162011A |
| 163 | Dy | CD33 | WM53 | Fluidigm | 3163023B |
| 164 | Du | CD45RO | UCHL1 | Fluidigm | 3164007B |
| 165 | Ho | CD127 | A019D5 | Fluidigm | 3165008B |
| 167 | Er | CCR7 | G043H7 | Fluidigm | 3167009A |
| 168 | Er | Ki67 | B56 | Fluidigm | 3168007B |
| 169 | Tm | CD25 | 2A3 | Fluidigm | 3169003B |
| 170 | Er | TCR Vα24-Jα18 (iNKT) | 6B11 | Fluidigm | 3170015B |
| 171 | Yb | CD68 | Y1/82A | BioLegend | 333802 |
| 172 | Yb | CD38 | HIT2 | Fluidigm | 3172007B |
| 174 | Yb | HLA-DR | L243 | Fluidigm | 3174001B |
| 175 | Lu | PD-1 | EH12.2H7 | Fluidigm | 3175008B |
| 176 | Yb | CD56 | NCAM16.2 | Fluidigm | 3176008B |
| 209 | Bi | CD16 | 3G8 | Fluidigm | 3209002B |
